# Supplementary material
Source: publisher figshare collection journal article supplement (https://acs.figshare.com/ndownloader/files/25889339)
Supplement: Supplementary file 1 [file 25889339]

## Supporting Information

### **Disturbances in microbial and metabolic communication across the gut-liver axis induced by a dioxin-like pollutant: An integrated metagenomics and metabolomics analysis**

Chenyan Hu <sup>†</sup>, Mengyuan Liu <sup>‡,□</sup>, Teng Wan <sup>§</sup>, Lizhu Tang <sup>‡,□</sup>, Baili Sun <sup>‡,□</sup>, Bingsheng Zhou <sup>‡</sup>, James C. W. Lam <sup>#</sup>, Paul K. S. Lam <sup>§</sup>, Lianguo Chen <sup>‡,\*</sup>

<sup>†</sup> School of Chemistry and Environmental Engineering, Wuhan Institute of Technology, Wuhan 430072, China

<sup>‡</sup> State Key Laboratory of Freshwater Ecology and Biotechnology, Institute of Hydrobiology, Chinese Academy of Sciences, Wuhan 430072, China

<sup>□</sup> University of Chinese Academy of Sciences, Beijing 100049, China

<sup>§</sup> State Key Laboratory of Marine Pollution and Department of Chemistry, City University of Hong Kong, Kowloon, Hong Kong SAR, China

<sup>#</sup> Department of Science and Environmental Studies, The Education University of Hong Kong, Hong Kong SAR, China

#### **\* Corresponding author:**

Dr. Lianguo Chen

Tel: +86 27 68780042

Fax: +86 27 68780123

E-mail: lchenam@ihb.ac.cn

Number of pages: 20

Number of figures: 13

Number of tables: 4

## FIGURE CAPTIONS

**Figure S1.** Changes in the bacterial phylum composition (A) and Firmicutes/Bacteroidetes (F/B) ratio (B) in zebrafish feces after exposure to PCB126. Values are presented as mean  $\pm$  SEM of three replicates ( $n = 3$ ).  $*P < 0.05$  and  $**P < 0.01$  indicate significant difference between the PCB126 exposure group and the corresponding control group.

**Figure S2.** (A) Hierarchical clustering based on representative genera (relative abundance  $> 1\%$ ) showing the fecal microbial community at genus level; Intensity of red color is proportional to the genus abundance. (B) Co-occurrence network based on representative genera (relative abundance  $> 1\%$ ) showing the dynamic interaction; Positive interactions among bacteria are indicated by blue lines, and negative interactions are indicated by red lines; Genus abundance is represented by the circular area and width of lines is proportional to the magnitude of correlation. Values are presented as means of three replicates ( $n = 3$ ).

**Figure S3.** Significant alterations in the relative abundance of representative bacterial genera (relative abundance  $> 1\%$ ) in (A) male and (B) female zebrafish after exposure to PCB126. Values are presented as mean  $\pm$  SEM of three replicates ( $n = 3$ ).  $*P < 0.05$ ,  $**P < 0.01$  and  $***P < 0.001$  indicate significant difference between the PCB126 exposure group and the corresponding control group.

**Figure S4.** Principal component analysis (PCA) of genus composition in male and female zebrafish after exposure to PCB126. The arrows indicate the major contribution of each genus to the variances among samples.

**Figure S5.** Significantly enriched biological processes of fecal bacteria according to metagenomic analysis in (A) male and (B) female zebrafish after exposure to PCB126.  $*P < 0.05$ ,  $**P < 0.01$  and  $***P < 0.001$  indicate significant enrichment in PCB126 exposure group relative to the control group.

**Figure S6.** Volcano plots of intestinal metabolomic features in male and female zebrafish after exposure to PCB126. (A) Male C18; (B) Male HILIC; (C) Female C18; (D) Female HILIC. A  $P$ -value  $< 0.05$  and VIP  $> 1$  were selected as the filtering criteria

to identify the significantly changed metabolites. Significantly up-regulated metabolites are labeled by red dots, and significantly down-regulated metabolites are labeled by green dots. Values are presented as means of three replicates ( $n = 3$ ).

**Figure S7.** Summary of differential metabolites (A, Male; B, Female) based on C18 or HILIC separation modes in zebrafish intestines after exposure to PCB126. Venn diagrams show the unique and common metabolites between males and females (C, C18; D, HILIC).

**Figure S8.** Volcano plots of blood metabolomic features in male and female zebrafish after exposure to PCB126. (A) Male C18; (B) Male HILIC; (C) Female C18; (D) Female HILIC. A  $P$ -value  $<0.05$  and  $VIP >1$  were selected as the filtering criteria to identify the significantly changed metabolites. Significantly up-regulated metabolites are labeled by red dots, and significantly down-regulated metabolites are labeled by green dots. Values are presented as means of three replicates ( $n = 3$ ).

**Figure S9.** Summary of differential metabolites (A, Male; B, Female) based on C18 or HILIC separation modes in zebrafish blood after exposure to PCB126. Venn diagrams show the unique and common metabolites between males and females (C, C18; D, HILIC).

**Figure S10.** OPLS-DA analysis with the input of intestinal metabolomic features. (A) Male C18; (B) Male HILIC; (C) Female C18; (D) Female HILIC.

**Figure S11.** OPLS-DA analysis with the input of blood metabolomic features. (A) Male C18; (B) Male HILIC; (C) Female C18; (D) Female HILIC

**Figure S12.** Significant enrichment of metabolic pathways under C18 mode (A) and HILIC mode (B) in male and female zebrafish intestines after exposure to PCB126.  $*P < 0.05$  and  $**P < 0.01$  indicate significant enrichment in PCB126 exposure group relative to the control group.

**Figure S13.** Significant enrichment of metabolic pathways under C18 mode (A) and HILIC mode (B) in male and female zebrafish blood samples after exposure to PCB126.  $*P < 0.05$  and  $**P < 0.01$  indicate significant enrichment in PCB126 exposure group relative to the control group.

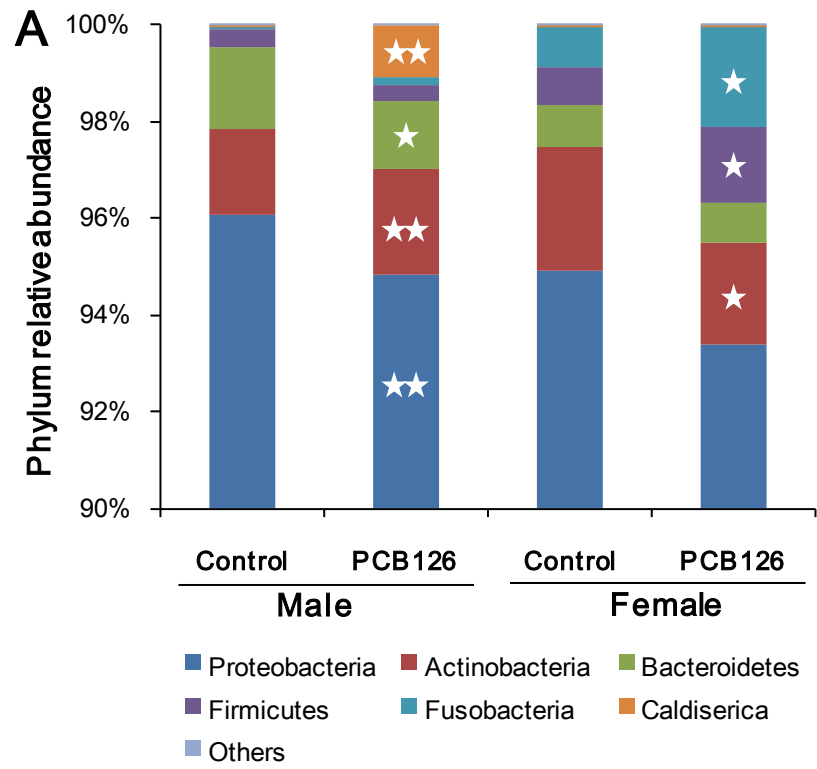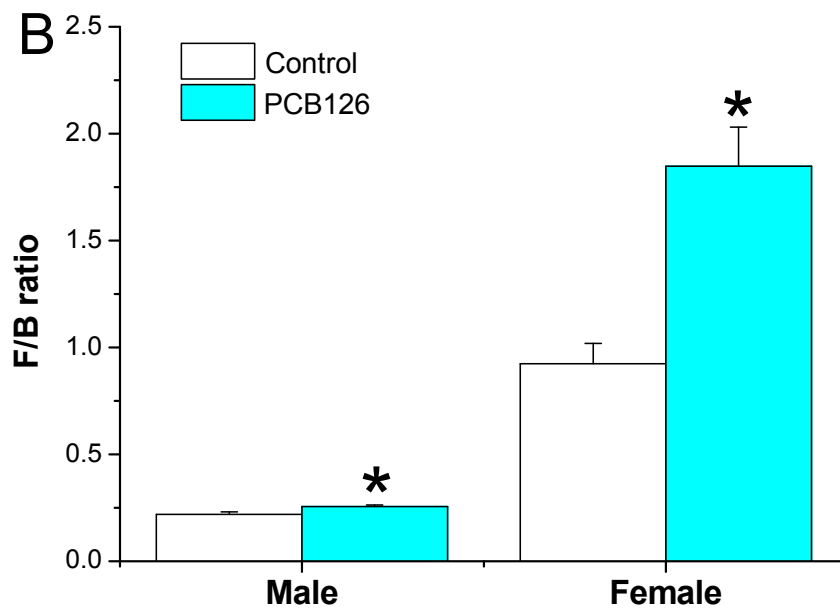

**Figure S1**

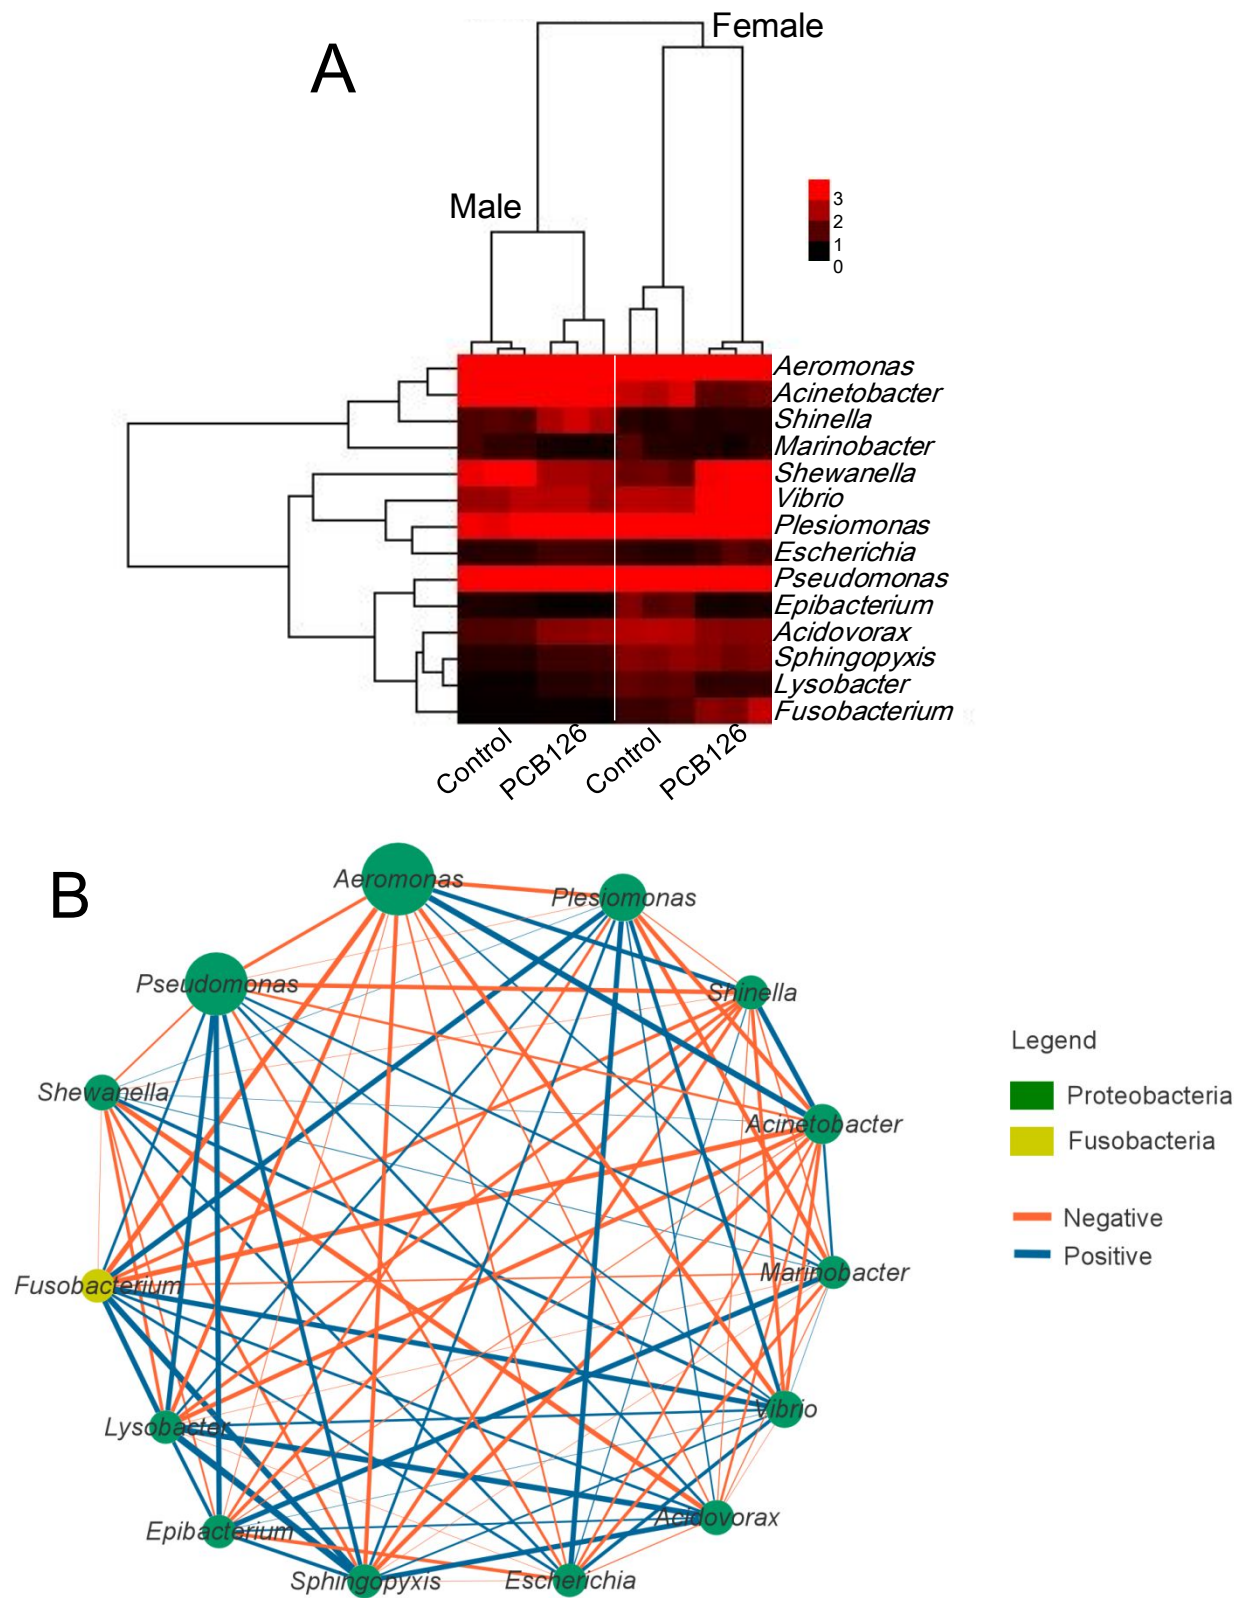

**Figure S2**

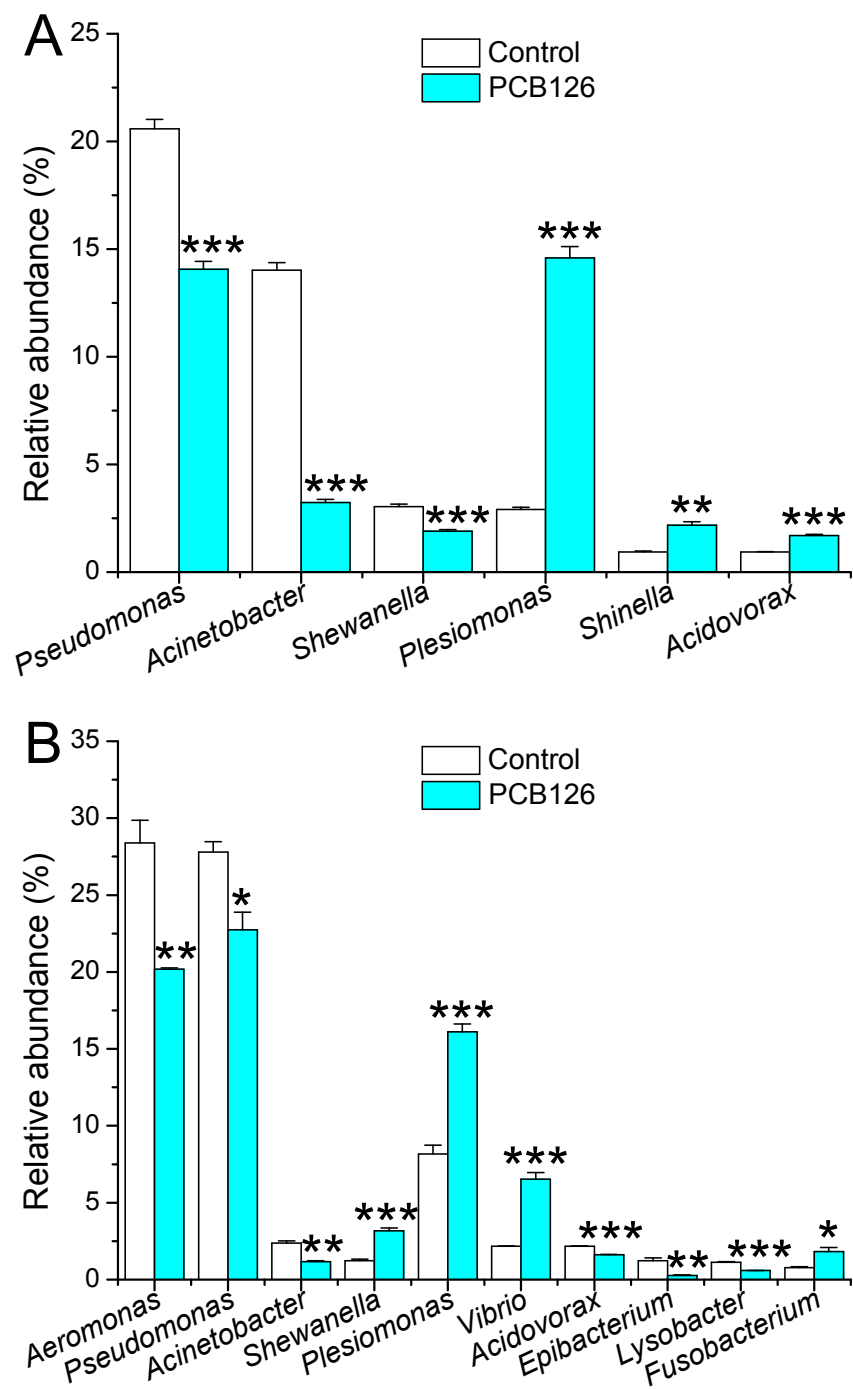

**Figure S3**

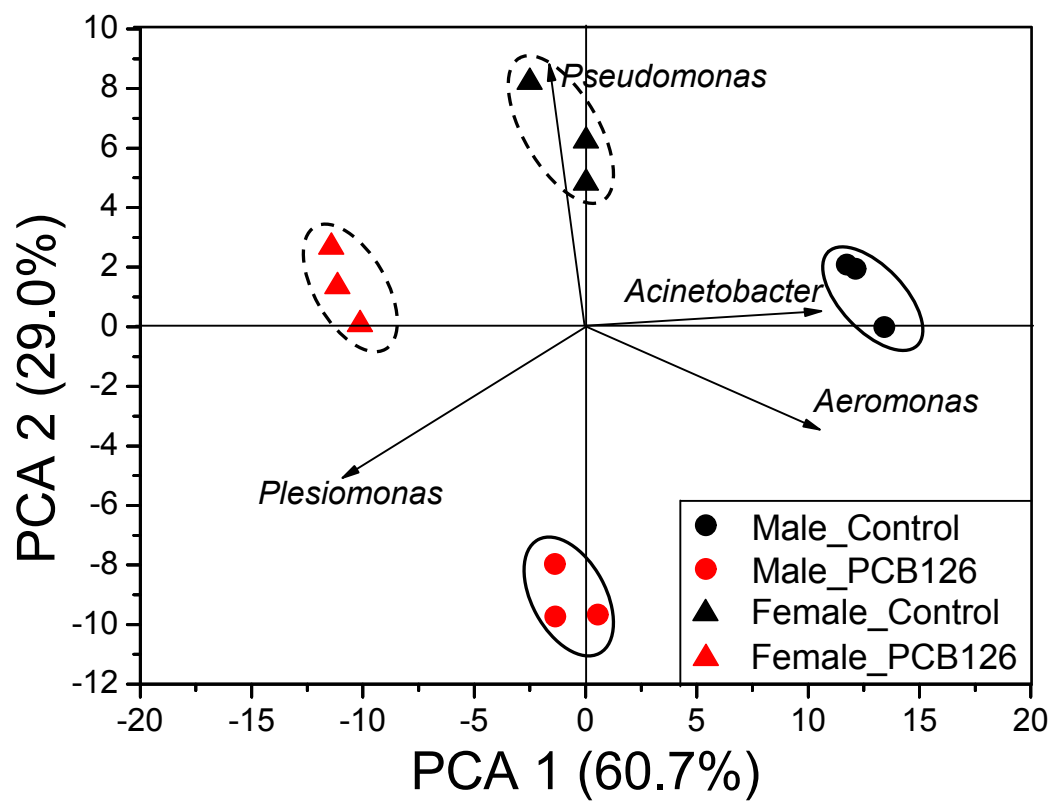

**Figure S4**

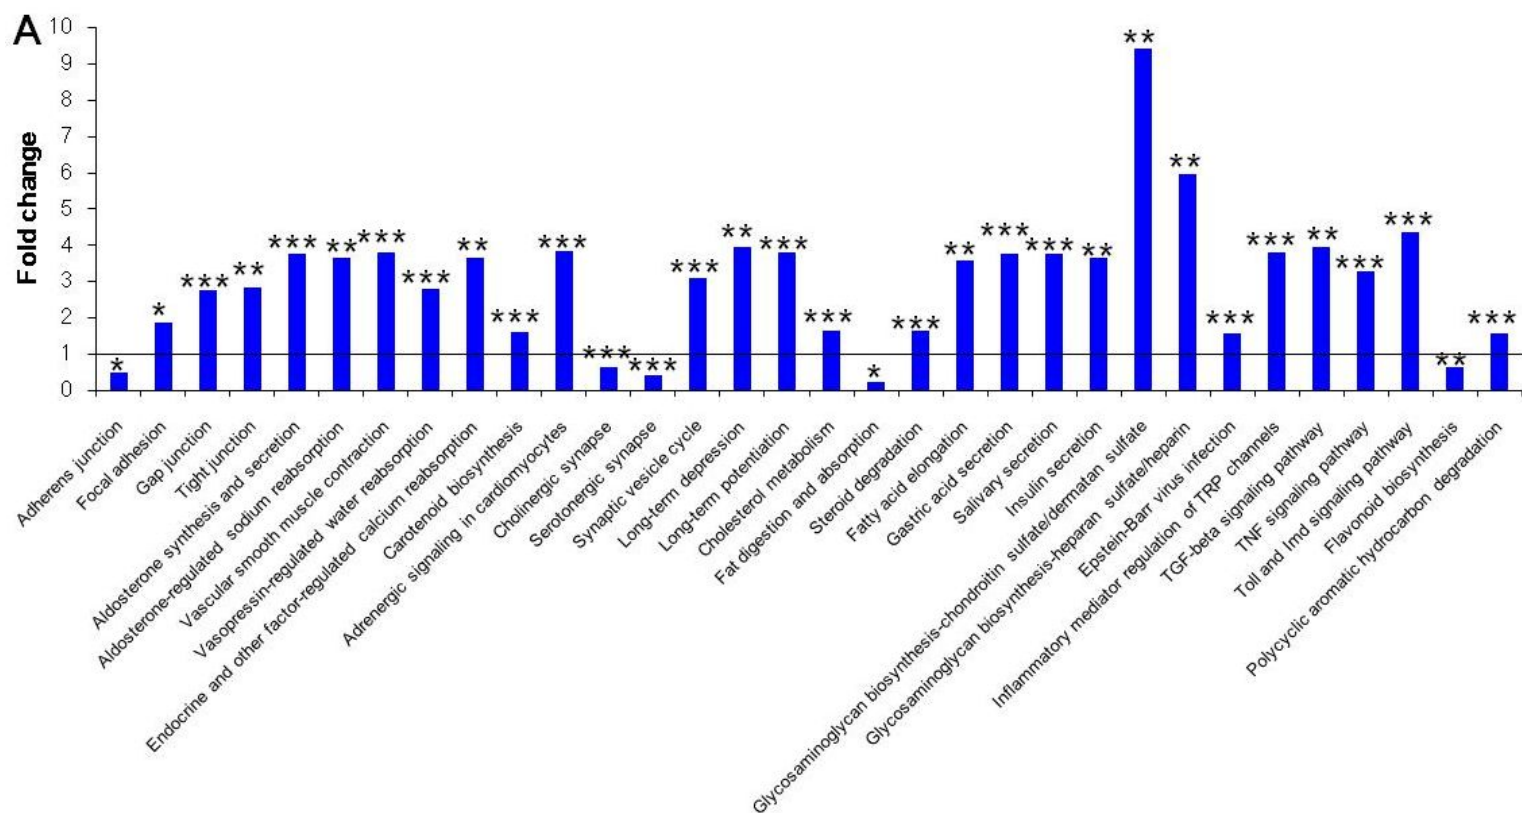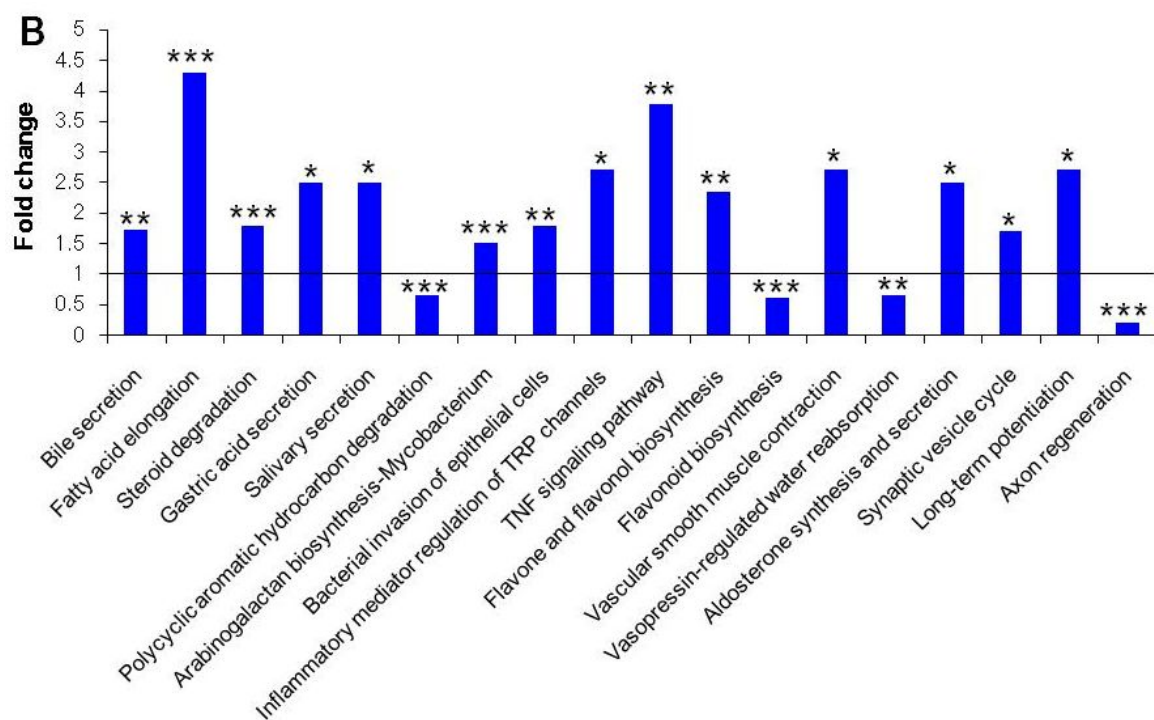

**Figure S5**



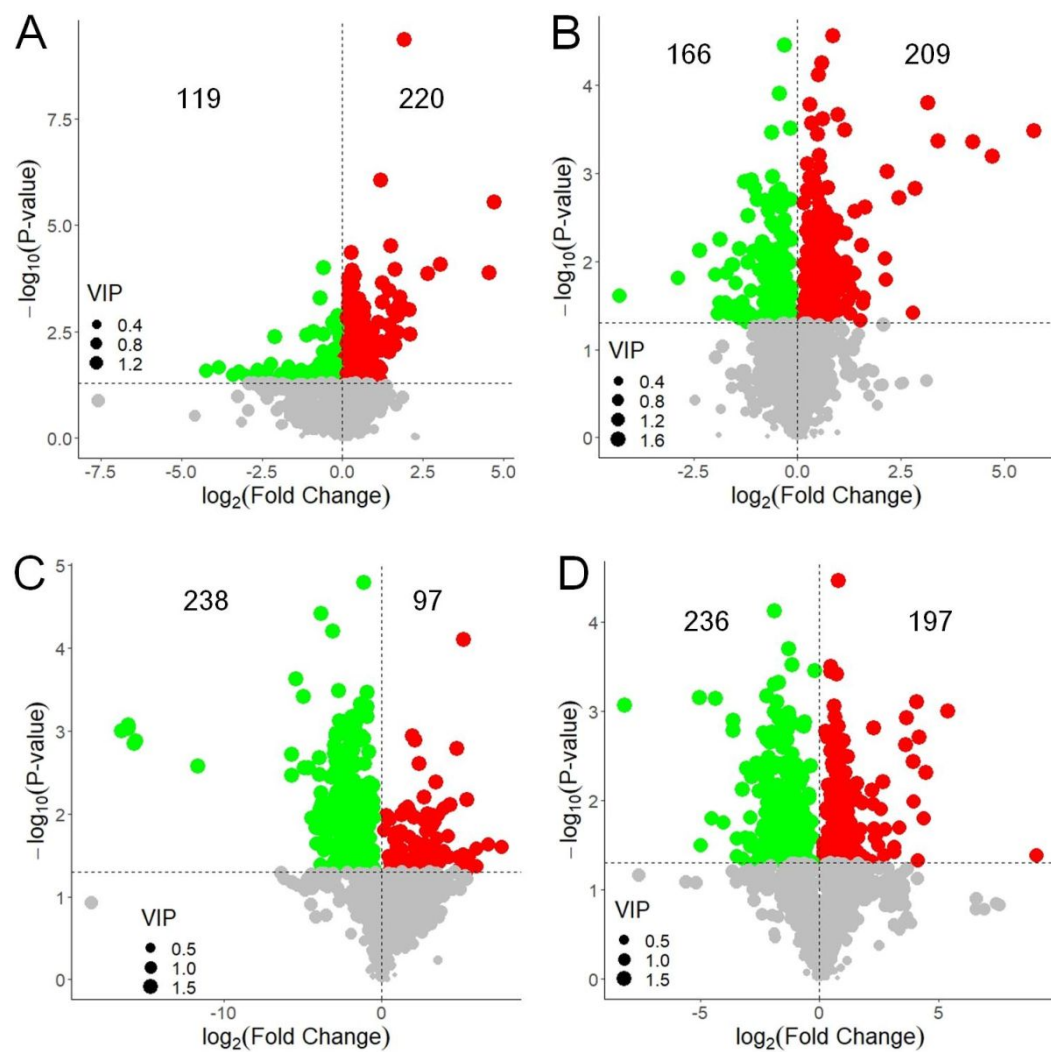

**Figure S6**

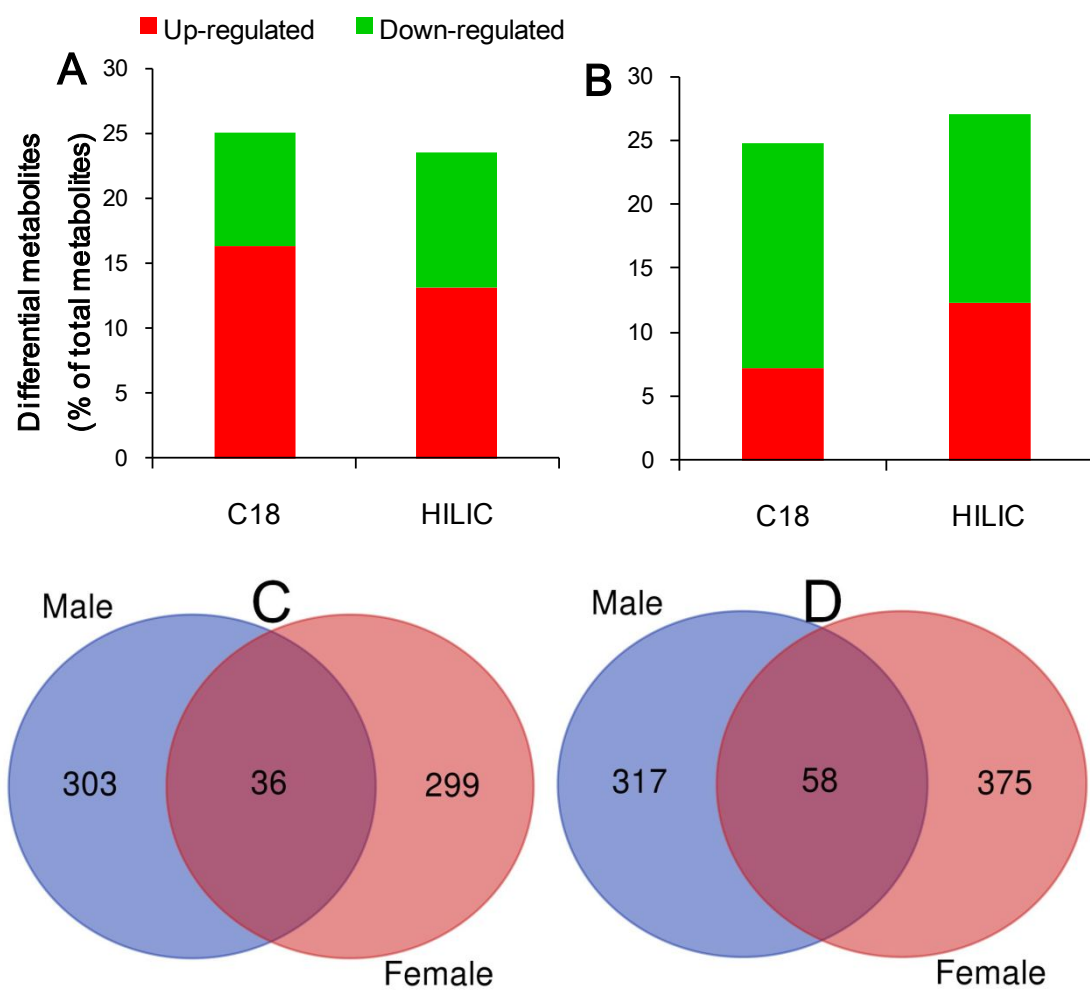

**Figure S7**

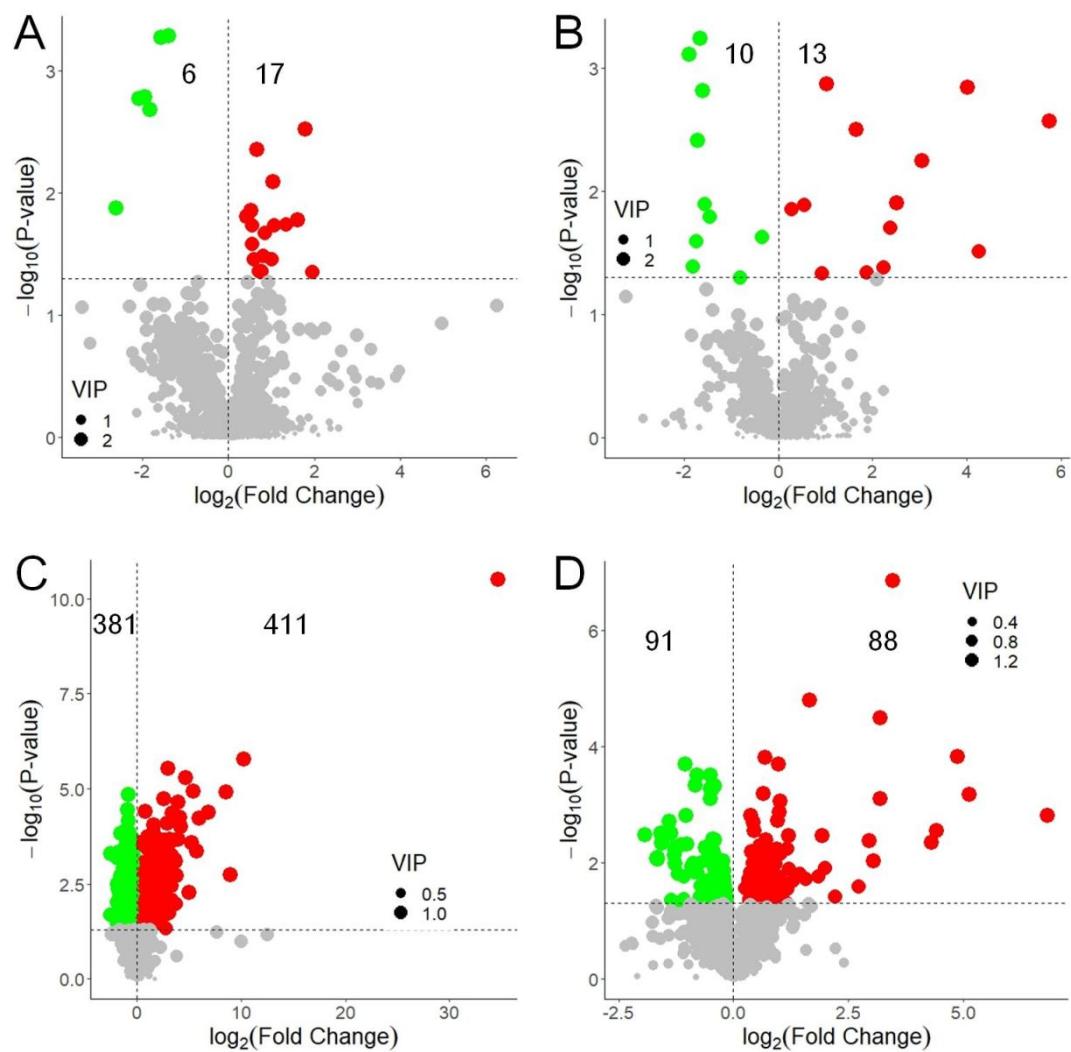

**Figure S8**

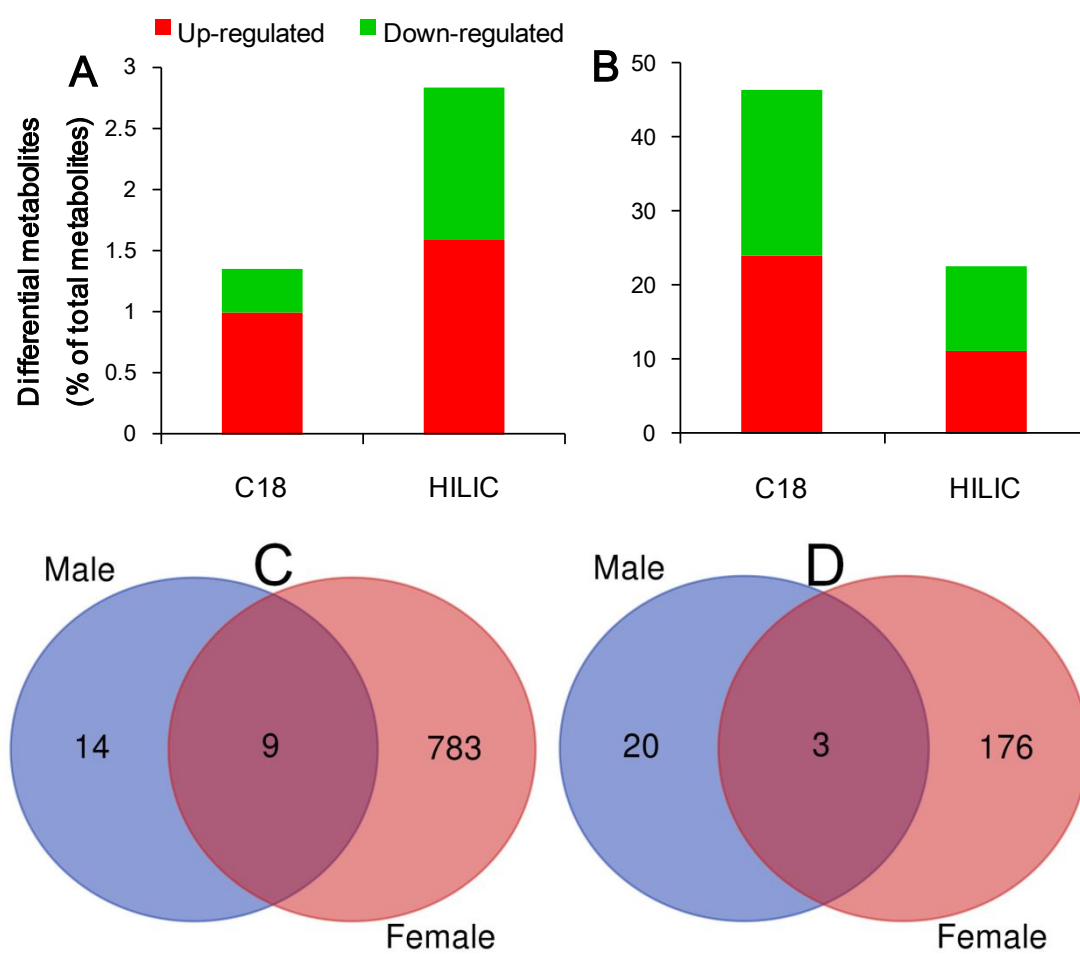

**Figure S9**

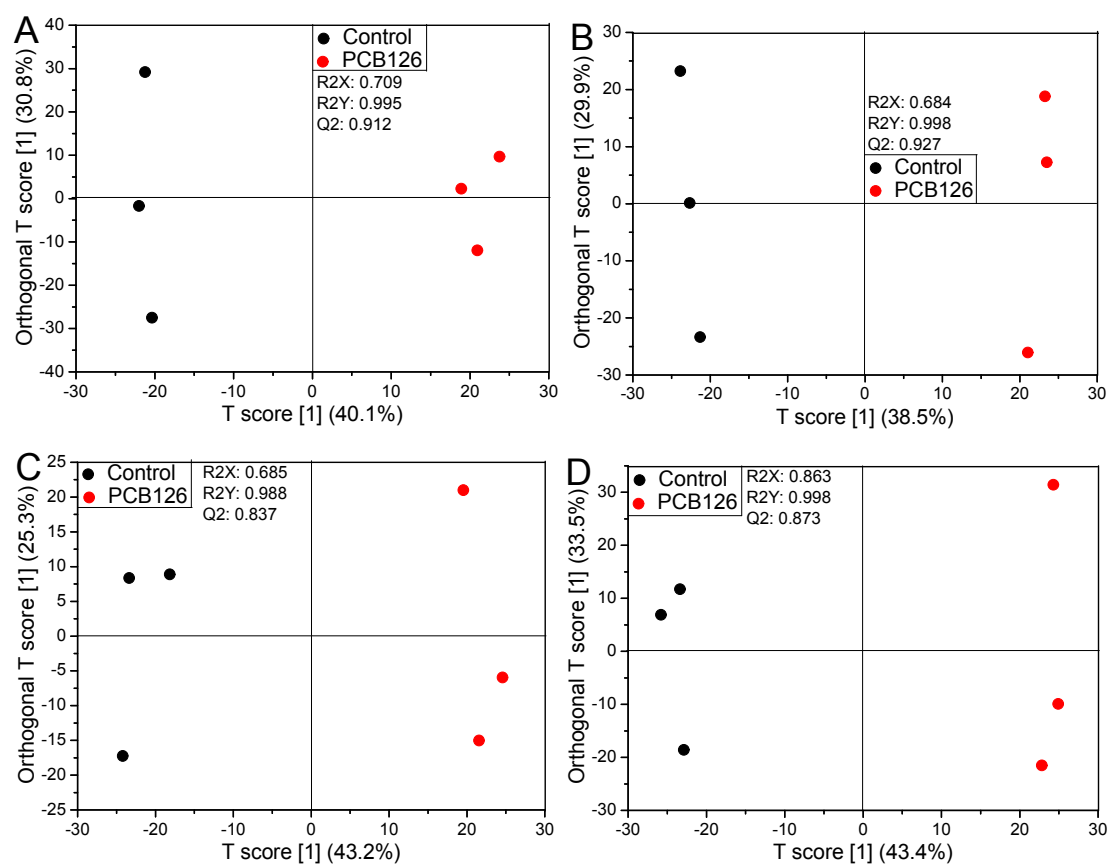

**Figure S10**

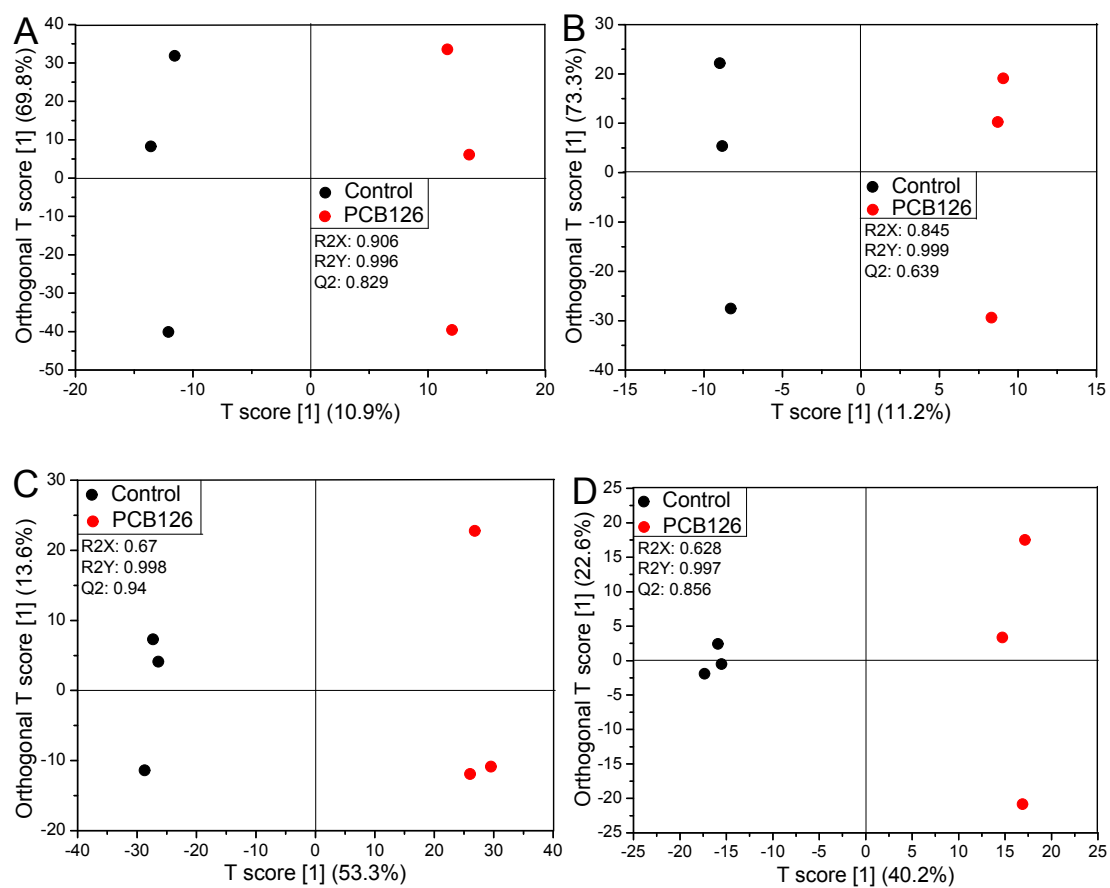

**Figure S11**

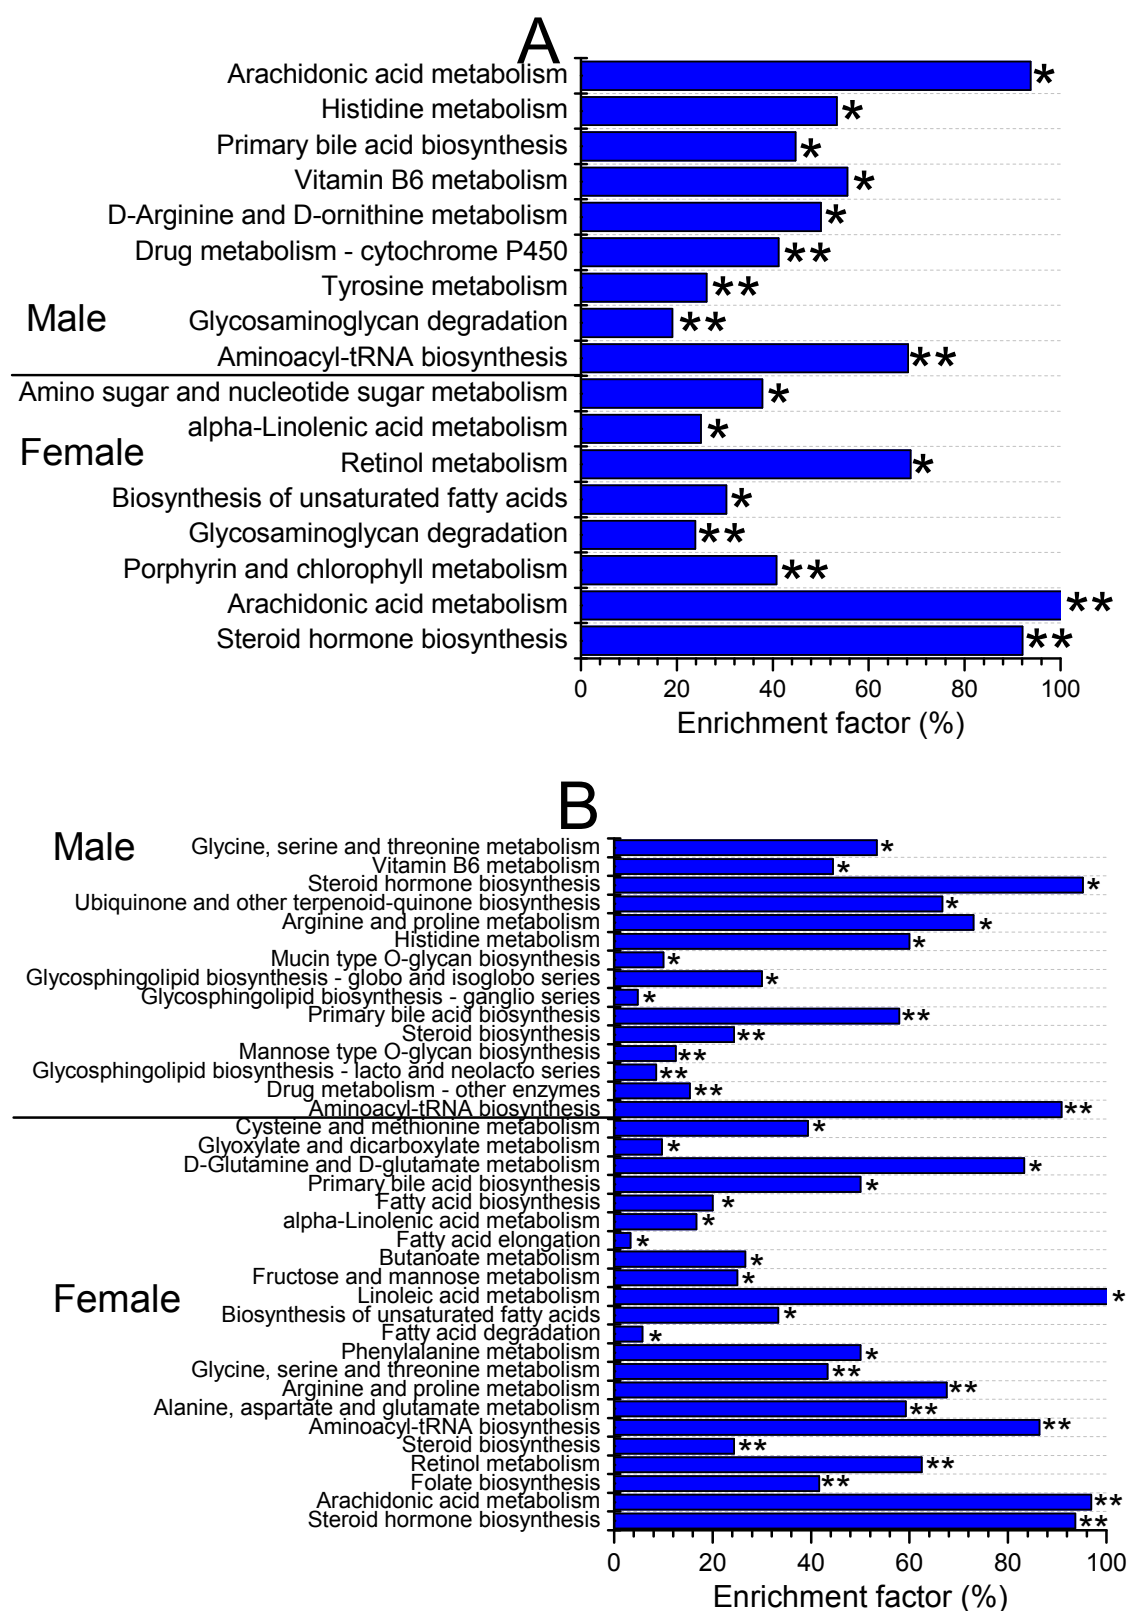

**Figure S12**

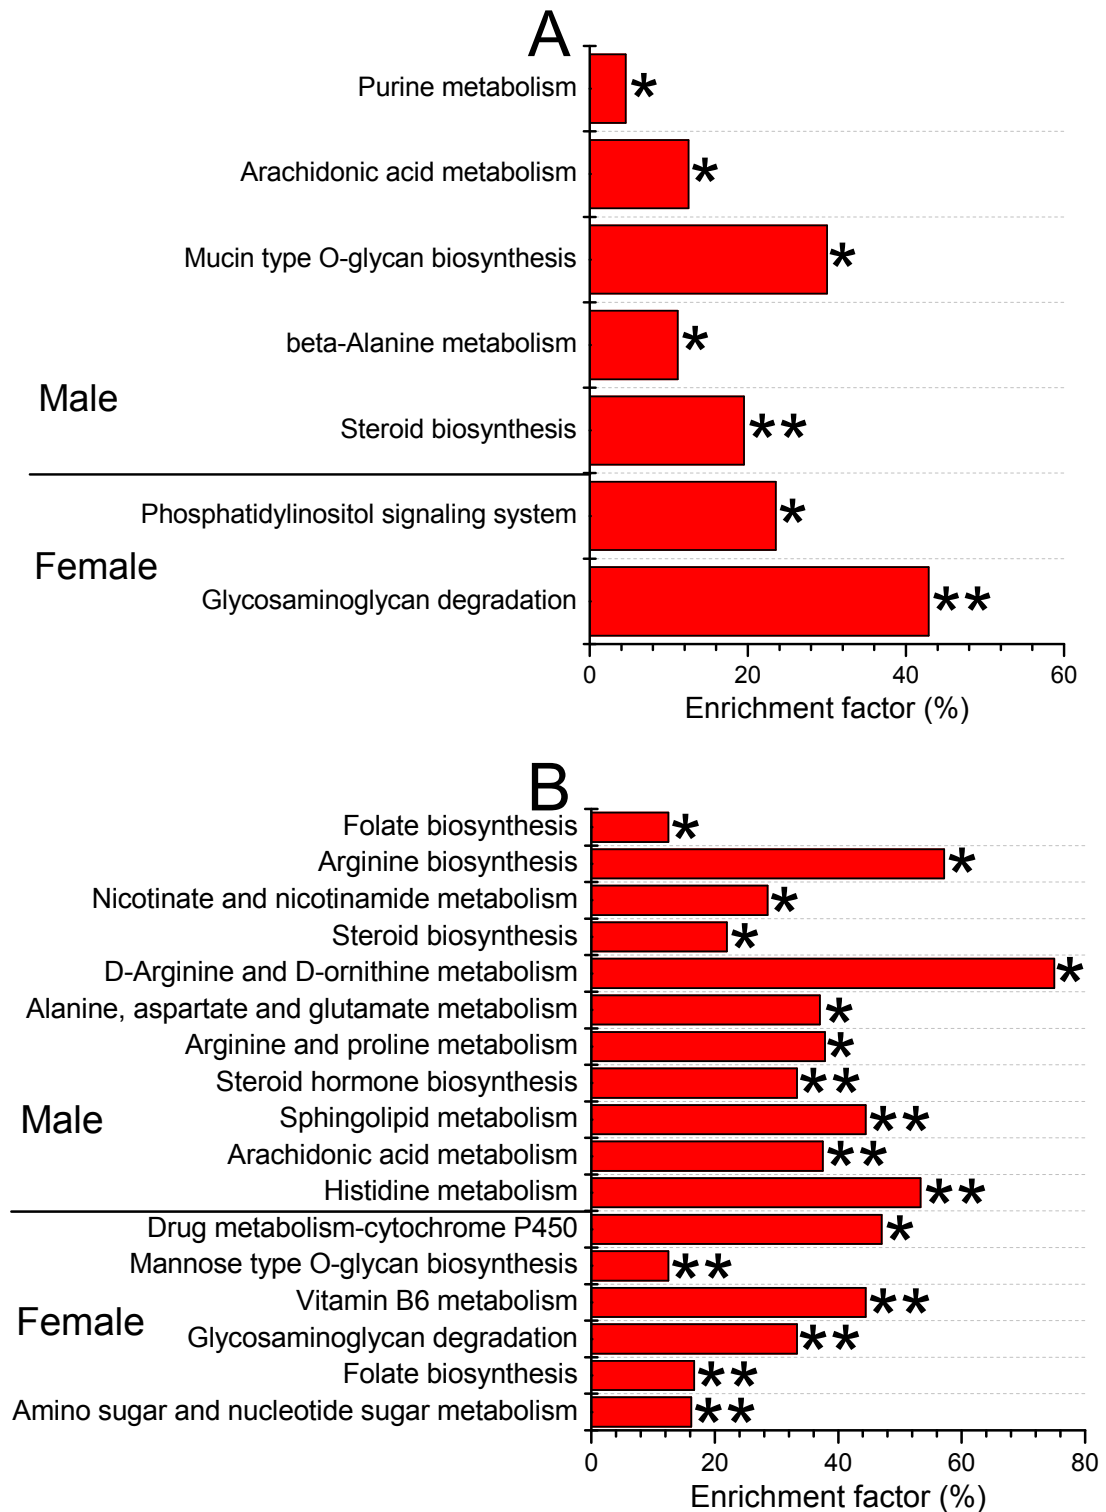

**Figure S13**



**Table S1.** Primer pairs of the selected genes examined in this study.<sup>a</sup>

| Gene name      | Sequence of the primer (5'–3')                     | Accession number |
|----------------|----------------------------------------------------|------------------|
| <i>cyp7a1</i>  | F: GATCTTCCCAGCTCTGATCG<br>R: GCAGAGTGTTGGCTTGTGAA | NM_201173 [1]    |
| <i>cyp7b1</i>  | F: CCGAACAGCTCTTTTTCAGG<br>R: TTTTCTCTCCGAGCACGTT  | XM_693936 [1]    |
| <i>cyp8b1</i>  | F: GTGGTCAAAGAGGCAAGAGC<br>R: ACACTTTGCCATTCCCAGAC | NM_001003736 [1] |
| <i>hsd3b7</i>  | F: CTCTGCAGGAACATCCCAAT<br>R: TGATCCACAGCATCCACACT | NM_199809 [1]    |
| <i>cyp27a1</i> | F: TCCAAAGGACTCGCTTCAGT<br>R: GCGTCTCGAAGAGAATGGAC | NM_001328513 [1] |
| <i>nr1h4</i>   | F: CACAACAAACATCGCATTCC<br>R: GCTGAAGACTTGGGCTGAAC | NM_001002574 [1] |
| <i>rpl8</i>    | F: TTGTTGGTGTGTTGCTGGT<br>R: GGATGCTCAACAGGGTTCAT  | NM_200713 [1]    |

<sup>a</sup> Abbreviations: **cyp7a1**, cholesterol 7- $\alpha$ -monooxygenase; **cyp7b1**, oxysterol 7 $\alpha$ -hydroxylase; **cyp8b1**, sterol 12 $\alpha$ -hydroxylase; **hsd3b7**, 3 $\beta$ -hydroxy- $\Delta$ 5-C27-steroid oxidoreductase; **cyp27a1**, sterol 27-hydroxylase; **nr1h4**, nuclear receptor subfamily 1, group H, member 4 (farnesoid X receptor); **rpl8**, ribosomal protein L8.

## Reference

(1) Chen, L.; Lam, J. C. W.; Tang, L.; Hu, C.; Liu, M.; Lam, P. K. S.; Zhou, B. Probiotic modulation of lipid metabolism disorders caused by perfluorobutanesulfonate pollution in zebrafish. *Environ. Sci. Technol.* **2020**, *54*, 7494–7503.

**Table S2.** Information of the metagenomic sequencing and assembled contigs.

| Metagenomes   |                  | Total raw reads | Total clean reads | Q30%  | Assembled contigs | N50 of contigs (bp) | Predicted ORFs |
|---------------|------------------|-----------------|-------------------|-------|-------------------|---------------------|----------------|
| <b>Male</b>   | <b>Control-1</b> | 87780808        | 84774084          | 94.07 | 282209            | 1868                | 565064         |
|               | <b>Control-2</b> | 88998548        | 85993166          | 93.97 | 301811            | 1863                | 604907         |
|               | <b>Control-3</b> | 81514398        | 79364820          | 95.04 | 254026            | 2125                | 528038         |
|               | <b>PCB126-1</b>  | 1.05E+08        | 1.02E+08          | 94.38 | 230320            | 3391                | 564413         |
|               | <b>PCB126-2</b>  | 52200881        | 50769638          | 95.04 | 173749            | 2813                | 410126         |
|               | <b>PCB126-3</b>  | 1.14E+08        | 1.1E+08           | 93.71 | 242616            | 3503                | 601370         |
| <b>Female</b> | <b>Control-1</b> | 91292840        | 88481070          | 94.31 | 251234            | 1980                | 520262         |
|               | <b>Control-2</b> | 1.19E+08        | 1.15E+08          | 94.12 | 276534            | 1965                | 573100         |
|               | <b>Control-3</b> | 1.06E+08        | 1.03E+08          | 93.84 | 270791            | 2127                | 572020         |
|               | <b>PCB126-1</b>  | 1.1E+08         | 1.06E+08          | 93.93 | 184460            | 3032                | 422390         |
|               | <b>PCB126-2</b>  | 77762530        | 75299952          | 94.27 | 153184            | 2972                | 353740         |
|               | <b>PCB126-3</b>  | 91314034        | 87775040          | 92.81 | 175420            | 2874                | 395711         |

**Table S3.** Biochemical alterations in intestine, blood and liver tissues of male and female zebrafish after exposure to 1.0 µg/L PCB126.<sup>a,b</sup>

| Tissues          | Indices                                       | Male         |              | Female       |              |
|------------------|-----------------------------------------------|--------------|--------------|--------------|--------------|
|                  |                                               | Control      | PCB126       | Control      | PCB126       |
| <b>Intestine</b> | <b>Bile acids</b><br>(nmol/mg protein)        | 0.6 ± 0.2    | 0.5 ± 0.2    | 0.4 ± 0.0    | 0.3 ± 0.0    |
|                  | <b>Total cholesterol</b><br>(µmol/mg protein) | 0.1 ± 0.0    | 0.1 ± 0.0    | 0.3 ± 0.1    | 0.1 ± 0.0    |
|                  | <b>Free fatty acid</b><br>(µmol/mg protein)   | 0.1 ± 0.1    | 0.1 ± 0.1    | 0.0 ± 0.0    | 0.0 ± 0.0    |
|                  | <b>Glycerol</b><br>(nmol/mg protein)          | 0.4 ± 0.0    | 0.3 ± 0.0    | 0.5 ± 0.0    | 0.3 ± 0.1    |
| <b>Blood</b>     | <b>Bile acids</b><br>(nmol/mg protein)        | 5.6 ± 1.8    | 4.8 ± 0.7    | 3.5 ± 0.2    | 1.9 ± 0.4*   |
|                  | <b>Total cholesterol</b><br>(µmol/mg protein) | 2.4 ± 0.8    | 2.2 ± 0.4    | 3.1 ± 0.2    | 2.4 ± 0.3    |
|                  | <b>HDL-C</b><br>(µmol/mg protein)             | 20.9 ± 7.4   | 6.6 ± 1.4    | 9.3 ± 0.4    | 7.5 ± 0.6    |
|                  | <b>LDL-C</b><br>(µmol/mg protein)             | 0.1 ± 0.0    | 0.2 ± 0.0    | 0.4 ± 0.1    | 0.3 ± 0.1    |
| <b>Liver</b>     | <b>Bile acids</b><br>(nmol/mg protein)        | 6.9 ± 0.4    | 5.1 ± 0.4*   | 8.7 ± 0.6    | 8.0 ± 1.8    |
|                  | <b>Total cholesterol</b><br>(µmol/mg protein) | 0.4 ± 0.2    | 0.2 ± 0.0    | 0.7 ± 0.1    | 0.8 ± 0.2    |
|                  | <b>Cholecystokinin</b><br>(pg/mg protein)     | 108.2 ± 28.0 | 121.2 ± 13.2 | 182.6 ± 32.9 | 140.1 ± 50.9 |

<sup>a</sup> Abbreviations: LDL-C, Low-density lipoprotein cholesterol; HDL-C, High-density lipoprotein cholesterol;

<sup>b</sup> Values represent the mean ± SEM of three replicates ( $n = 3$ );

\* $P < 0.05$  indicates significant difference between the PCB126 exposure group and the corresponding control group.

**Table S4.** Gene transcriptional changes involved in hepatic bile acid metabolisms of male and female zebrafish after exposure to 1.0 µg/L PCB126.<sup>a,b</sup>

| Genes          | Male      |              | Female    |             |
|----------------|-----------|--------------|-----------|-------------|
|                | Control   | PCB126       | Control   | PCB126      |
| <i>cyp7a1</i>  | 1.0 ± 0.0 | 0.1 ± 0.0*** | 1.1 ± 0.4 | 1.5 ± 0.4   |
| <i>cyp7b1</i>  | 1.0 ± 0.3 | 4.8 ± 0.7*   | 1.1 ± 0.3 | 1.4 ± 0.5   |
| <i>cyp8b1</i>  | 1.0 ± 0.1 | 0.8 ± 0.0    | 1.0 ± 0.1 | 2.4 ± 0.3** |
| <i>hsd3b7</i>  | 1.0 ± 0.0 | 2.0 ± 0.2**  | 1.0 ± 0.2 | 2.7 ± 0.4*  |
| <i>cyp27a1</i> | 1.0 ± 0.2 | 0.8 ± 0.1    | 1.0 ± 0.2 | 1.3 ± 0.1   |
| <i>nr1h4</i>   | 1.0 ± 0.1 | 1.2 ± 0.1    | 1.0 ± 0.0 | 1.7 ± 0.2*  |

<sup>a</sup> Abbreviations: **cyp7a1**, cholesterol 7- $\alpha$ -monooxygenase; **cyp7b1**, oxysterol 7 $\alpha$ -hydroxylase; **cyp8b1**, sterol 12 $\alpha$ -hydroxylase; **hsd3b7**, 3 $\beta$ -hydroxy- $\Delta$ 5-C27-steroid oxidoreductase; **cyp27a1**, sterol 27-hydroxylase; **nr1h4**, nuclear receptor subfamily 1, group H, member 4 (farnesoid X receptor).

<sup>b</sup> Values represent the mean  $\pm$  SEM of three replicates ( $n = 3$ );

\* $P < 0.05$ , \*\* $P < 0.01$  and \*\*\* $P < 0.001$  indicate significant difference between the PCB126 exposure group and the corresponding control group.
